# Supplementary material for: Prognostic Role of Albumin, Bilirubin, and ALBI Scores: Analysis of 1000 Patients with Hepatocellular Carcinoma Undergoing Radioembolization
Source: PubMed Central journal article supplement (PMC6627853; doi:10.3390/cancers11060879), 2019-06-24
Supplement: cancers-11-00879-s001.pdf [file cancers-11-00879-s001.pdf]

## Supplementary materials

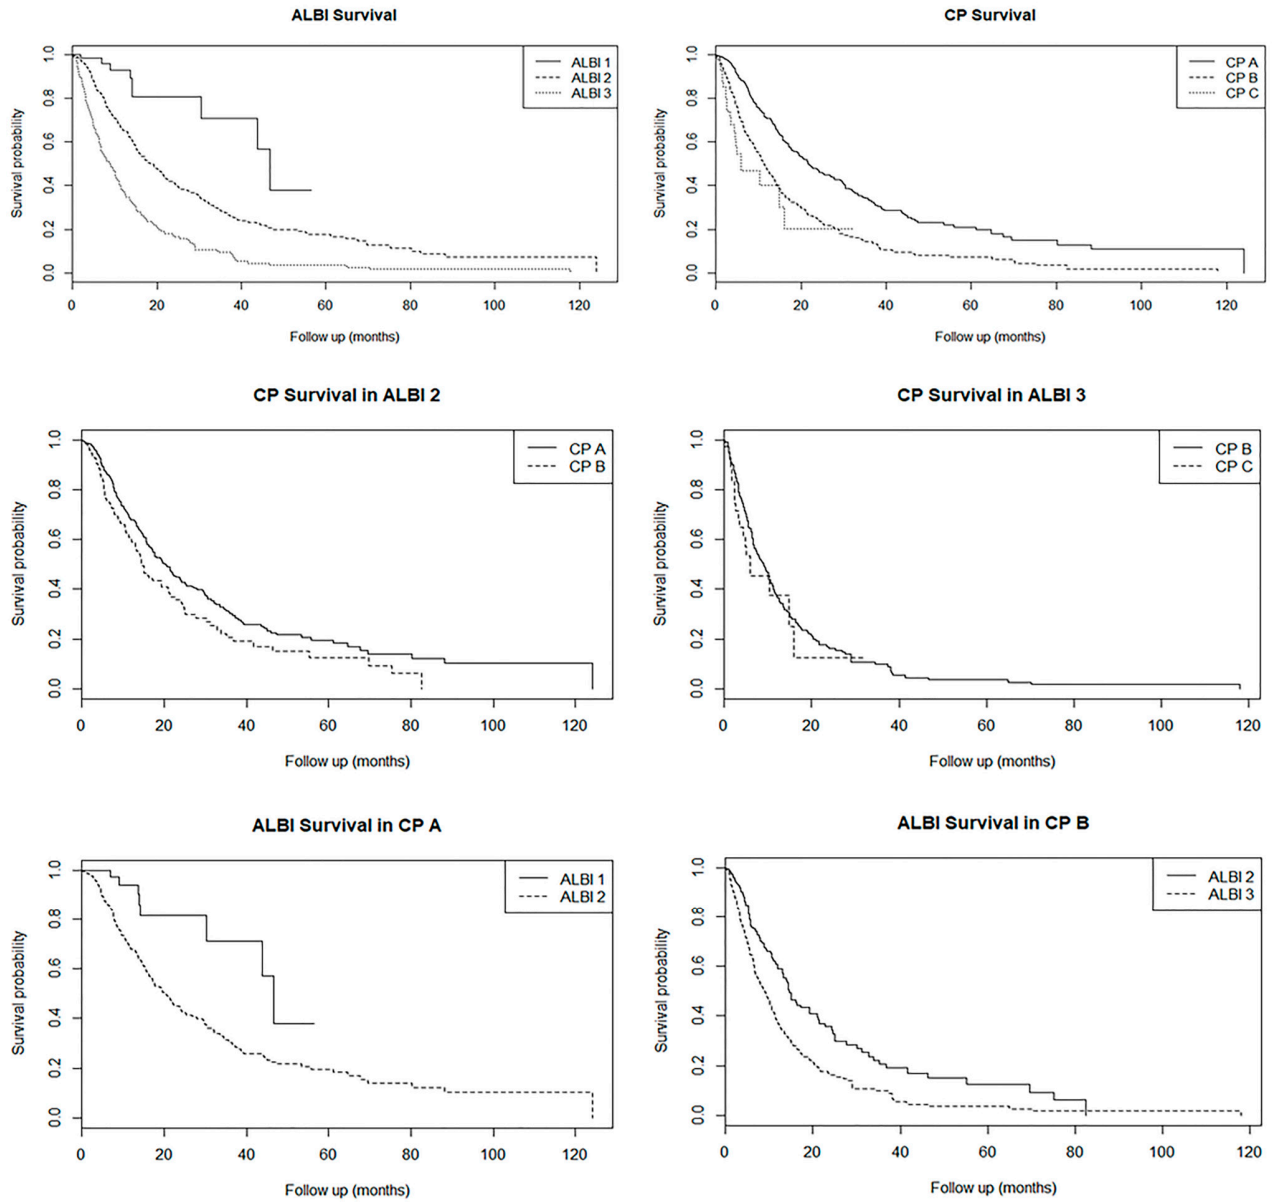

Figure S1. ALBI, CP Survival Analysis.

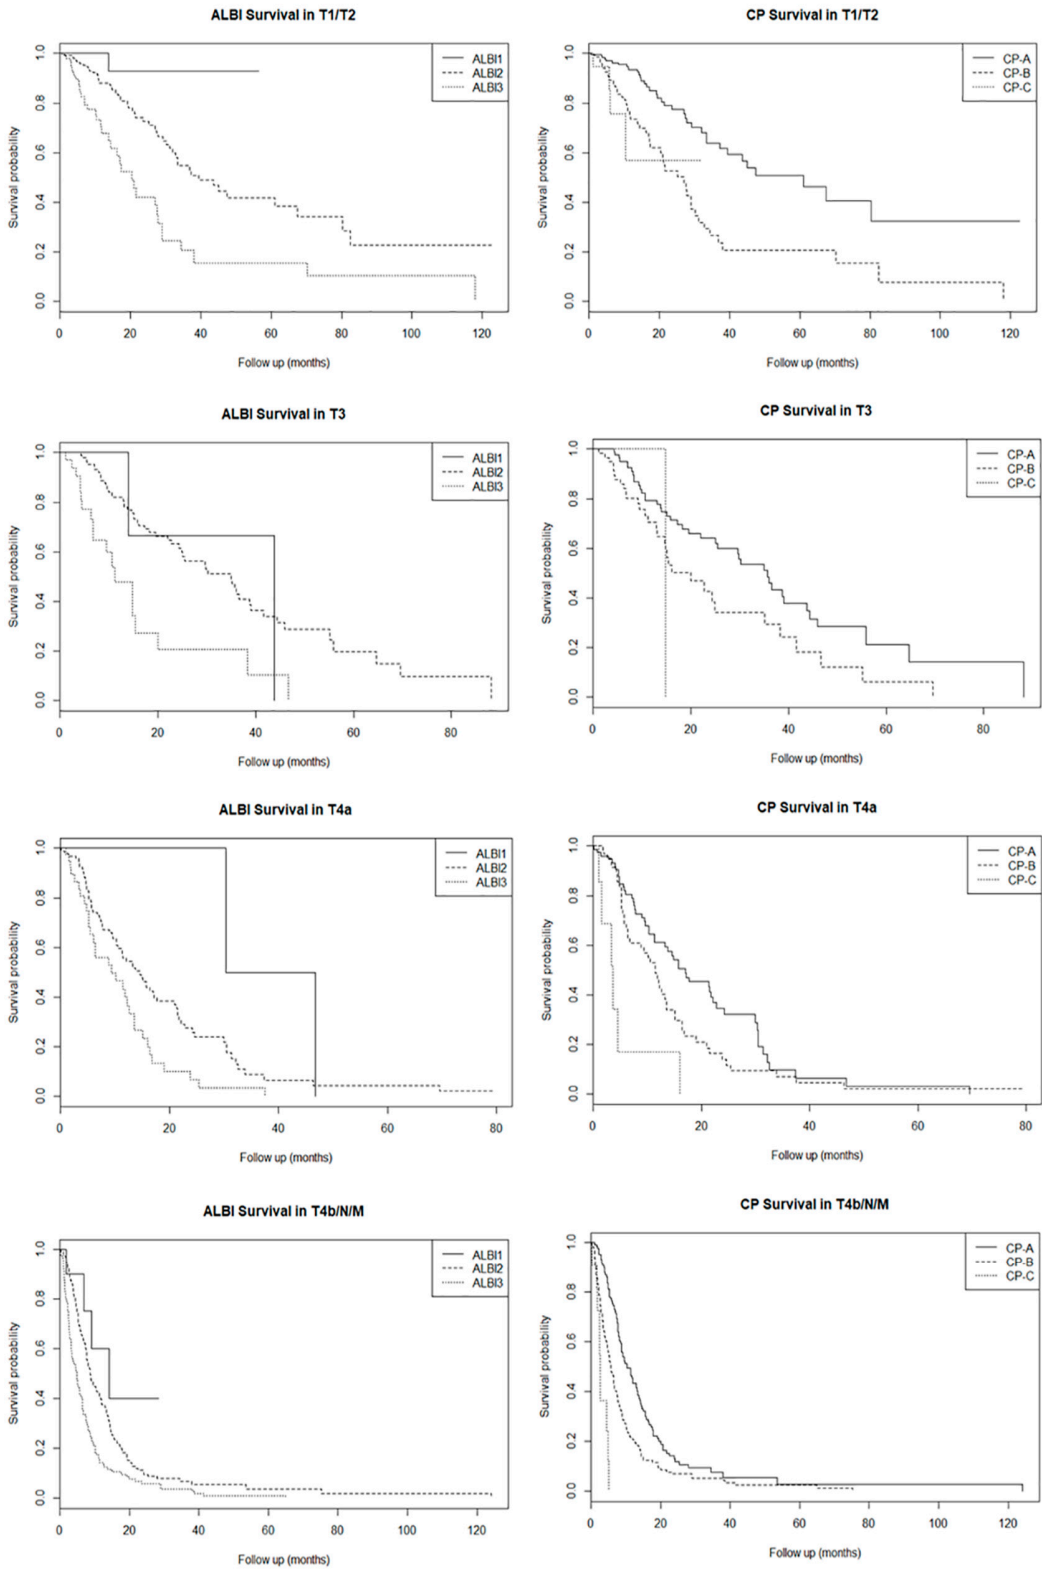

Figure S2. ALBI, CP Survival in UNOS.

### UNOS T1,T2 Survival

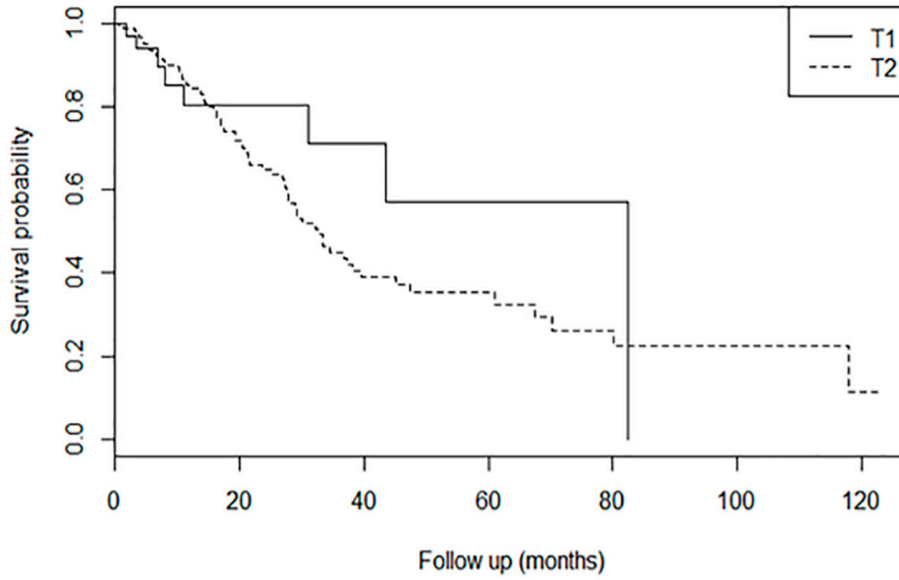

### UNOS T4b,N,M Survival

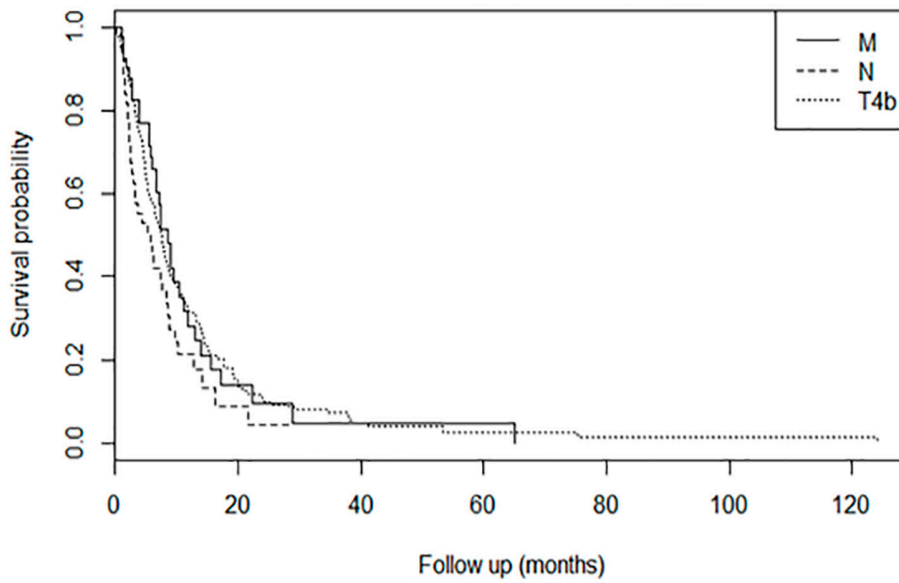

Figure S3. UNOS T1/T2 and T4b/N/M.
